# Supplementary material for: Biodegradable PCL-b-PLA Microspheres with Nanopores Prepared via RAFT Polymerization and UV Photodegradation of Poly(Methyl Vinyl Ketone) Blocks
Source: MDPI journal article supplement (doi:10.3390/polym13223964), 2021-11-16
Supplement: s1 [file s1]

# Biodegradable PCL-b-PLA Microspheres with Nanopores Prepared by RAFT Polymerization and UV Photodegradation of Poly(methyl vinyl ketone) Blocks

Taeyoon Kim<sup>1,2</sup>, Sorim Lee<sup>1</sup>, Soo-Yong Park<sup>1</sup>, Ildoo Chung<sup>1,\*</sup>

<sup>1</sup> Department of Polymer Science and Engineering, Pusan National University, Busan 46241, Korea

<sup>2</sup> Convergence Research Center for Energy and Environmental Sciences, Sungkyunkwan University (SKKU), Suwon 16419, Korea

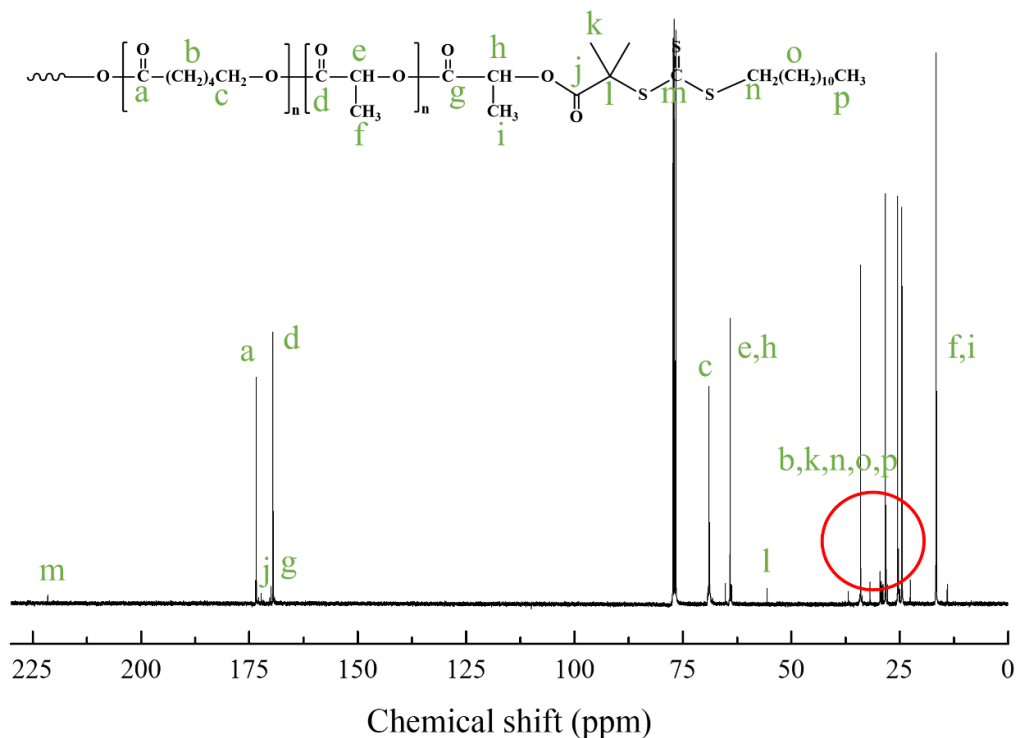

Figure S1. <sup>13</sup>C NMR spectrum of PCL-b-PLA-TTC.

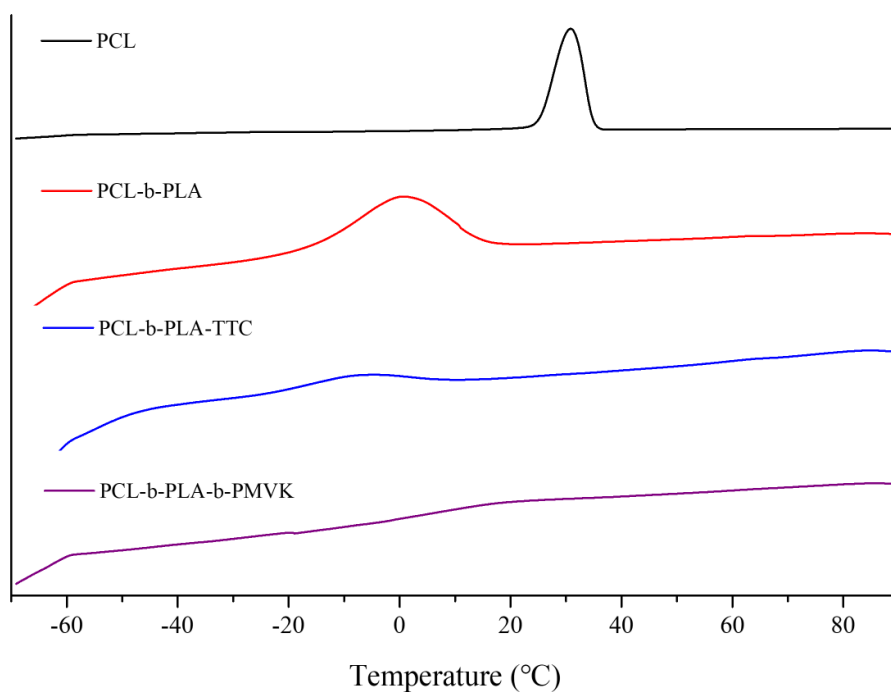

Figure S2. DSC cooling curve of PCL, PCL-b-PLA, PCL-b-PLA-b-PMVK.

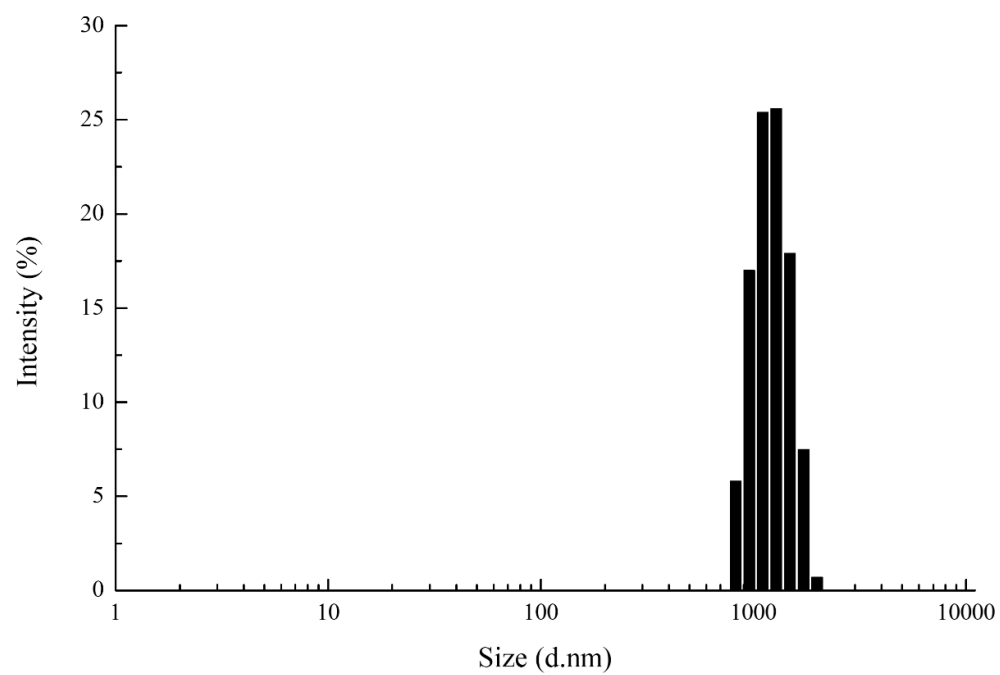

**Figure S3.** DLS measurements of PCL-b-PLA-b-PMVK microspheres.
